# Supplementary material for: Medial Rectus Tendon Elongation with Bovine Pericard (Tutopatch®) in Thyroid-Associated Orbitopathy: A Long-Term Follow-Up including Oculodynamic MRI
Source: J Ophthalmol. 2018 Jul 24;2018:1294761. doi: 10.1155/2018/1294761 (PMC6081543; doi:10.1155/2018/1294761)
Supplement: Supplementary 4 — Video 4: patient 5: OD-MRI supplementary videos 4–6 show the dramatically improved horizontal and vertical motility. The swollen orbital tissue (OS > OD) is displaced nasally following medial wall decompression. On the horizontal OD-MRI (supplementary video 4), the asymmetry of the Tutopatch elongation (OS > OD) can be appreciated. In contrast to P1, P2, and P4, a second proximal thickening in the area of Tutopatch is indicative of adhesions (scar tissue) to the surrounding connective tissue in the area of the suture between Tutopatch and the muscle. As a consequence, abduction is noticeably impaired and comes to a more abrupt stop, which may also reflect the greater amount of orbital fat. [file 1294761.f4.zip]

Archive with 3 entries (3 files):
- Video 4.mov
- Video 5.mov
- Video 6.mov
